# Supplementary material
Source: publisher figshare collection journal article supplement (https://sage.figshare.com/ndownloader/files/23482643)
Supplement: Supplementary file 1 [file 23482643]

**Supplementary Table 2** Demographic and clinical characteristics of the caregivers (N=162)

| Characteristics | Inpatients group, N=12 | Outpatients group, N= 150 | Total, N=162 | z/x2 | *p* |
| --- | --- | --- | --- | --- | --- |
| **Gender** |  |  |  | 1.76 | 0.19 |
| Male | 6(50.0) | 47(31.3) | 53(32.7) |  |  |
| Female | 6(50.0) | 103(94.5) | 109(67.3) |  |  |
| **Age** | 54.7±14.3 | 59.5±12.3 | 59.1±12.5 | -1.12 | 0.26 |
| **Duration of caring** | 9.25±3.1 | 7.6±5.5 | 7.7±5.3 | -1.75 | 0.08 |
| **Education** |  |  |  | 1.04 | 0.31 |
| Less than high school(<12) | 2(16.7) | 46(30.7) | 48(29.6) |  |  |
| More than college(≧12) | 10(83.3) | 104(69.3) | 114(70.4) |  |  |
| **Years of education** | 13.1±3.7 | 11.5±4.2 | 11.7±4.2 | -1.47 | 0.14 |
| **Marital Status** |  |  |  | 0.16 | 0.69 |
| Unmarried | 2(16.7) | 21(14.0) | 23(14.2) |  |  |
| Married | 10(83.3) | 129(86.0) | 139(85.8) |  |  |
| **Unemployment** | 7(58.3) | 101(67.3) | 108(66.7) | 0.41 | 0.53 |
| **Comorbid with other diseases** | 4(33.3) | 76(50.7) | 80(49.4) | 1.34 | 0.25 |
| **Past psychiatric history** |  |  |  | 0.01 | 0.91 |
| No psychiatric history | 11(91.7) | 136(90.7) | 147(90.7) |  |  |
| Depressive disorder | 0 | 6(4.0) | 6(3.7) |  |  |
| Anxiety disorder | 0 | 3(2.0) | 3(1.9) |  |  |
| Insomnia | 1(8.3) | 7(4.7) | 8(4.9) |  |  |
| **Suicide history** | 0 | 1(0.7) | 1(0.6) | 0.13 | 0.72 |
| **Family psychiatric history** |  |  |  | 0.76 | 0.68 |
| No psychiatric history | 12(100.0) | 141(94.0) | 153(94.4) |  |  |
| Depressive disorder | 0 | 7(4.7) | 7(4.3) |  |  |
| Anxiety disorder | 0 | 2(1.3) | 2(1.2) |  |  |
| **Family suicide history** | 0 | 6(4.0) | 6(3.7) | 0.50 | 0.48 |
| **Anxiolytics/Hypnotics use** | 1(8.3) | 16(10.7) | 17(10.5) | 0.06 | 0.80 |
| **Depressive** | 1(8.3) | 17(11.3) | 18(11.1) | 0.10 | 0.75 |
| **UPDRS of people with PD** | 41.8±22.2 | 37.7±12.2 | 37.9±13.1 | -0.11 | 0.91 |
| **H&Y staging** | 2.6±0.9 | 2.1±0.4 | 2.2±0.4 | -1.55 | 0.12 |
| **BHS** | 1.8(0-5) | 3.5(0-15) | 3.3(0-15) | -1.44 | 0.15 |
| **FSS** | 25.7±14.8 | 24.5±13.8 | 24.6±13.9 | -0.16 | 0.87 |
| **CDRISC** | 30.3±8.5 | 30.8±8.1 | 30.8±8.1 | -0.28 | 0.78 |
| **BFI-10** |  |  |  |  |  |
| Extraversion | 6.3±2.1 | 5.7±2.4 | 5.8±2.3 | -1.07 | 0.28 |
| Agreeableness | 6.5±1.3 | 6.6±1.6 | 6.6±1.6 | -0.19 | 0.85 |
| Conscientiousness | 8.0±2.0 | 7.9±1.7 | 7.9±1.7 | -0.17 | 0.86 |
| Neuroticism | 4.9±1.4 | 5.1±1.8 | 5.1±1.7 | -0.57 | 0.57 |
| Openness | 6.2±1.2 | 6.4±1.4 | 6.4±1.3 | -0.61 | 0.54 |
| **HAMD** | 2.8(0-16) | 3.7(0-26) | 3.6(0-26) | -1.04 | 0.30 |
| **HAMA** | 4.0(0-23) | 4.4(0-30) | 4.4(0-30) | -1.38 | 0.17 |
